1 **Mapping migration in a songbird using high-resolution genetic markers**

2

3 Kristen Ruegg<sup>1,2</sup>, Eric C. Anderson<sup>3,4</sup>, Kristina L. Paxton<sup>5,6</sup>, Vanessa Apkenas<sup>3</sup>, Sirena  
4 Lao<sup>1</sup>, Rodney B. Siegel<sup>7</sup>, David F. DeSante<sup>7</sup>, Frank Moore<sup>6</sup> and Thomas B. Smith<sup>1,8</sup>

5

6

7

8 <sup>1</sup>Center for Tropical Research, Institute of the Environment and Sustainability, University  
9 of California, Los Angeles, La Kretz Hall, Suite 300, 619 Charles E. Young Dr. East, Los  
10 Angeles, CA 90095, USA

11

12 <sup>2</sup>Department of Ecology and Evolutionary Biology, University of California, Santa Cruz,  
13 Santa Cruz, CA 95060, USA; e-mail: [kruegg@ucsc.edu](mailto:kruegg@ucsc.edu); phone: 510-292-5099

14

15 <sup>3</sup>Southwest Fisheries Science Center, National Marine Fisheries Service, 110 Shaffer  
16 Road, Santa Cruz, CA 95060, USA

17

18 <sup>4</sup>Department of Applied Mathematics and Statistics, University of California, Santa Cruz,  
19 CA 95060, USA

20

21 <sup>5</sup>Department of Biological Sciences, University of Southern Mississippi, Hattiesburg,  
22 MS 39406

23

24 <sup>6</sup>Department of Biology, University of Hawaii, Hilo, HI 96720, USA

25

26 <sup>7</sup>The Institute for Bird Populations, PO Box 1346, Point Reyes Station, CA 94956, USA

27

28 <sup>8</sup>Department of Ecology and Evolutionary Biology, University of California, Los  
29 Angles, CA, 90095, USA

30

31 **Neotropical migratory birds are declining across the Western Hemisphere, but**  
32 **conservation efforts have been hampered by the inability to assess where migrants**  
33 **are most limited – the breeding grounds, migratory stopover sites, or wintering**  
34 **areas. A major challenge has been the lack of an efficient, reliable, and broadly**  
35 **applicable method for connecting populations across the annual cycle. Here we**  
36 **show how high-resolution genetic markers can be used to identify populations of a**  
37 **migratory bird, the Wilson’s warbler (*Cardellina pusilla*), at fine enough spatial**  
38 **scales to facilitate assessing regional drivers of demographic trends. By screening**  
39 **1626 samples using 96 single nucleotide polymorphisms (SNPs) selected from a large**  
40 **pool of candidates (~450,000), we identify novel region-specific migratory routes and**  
41 **timetables of migration along the Pacific Flyway. Our results illustrate that high-**  
42 **resolution genetic markers are more reliable, accurate, and amenable to high**  
43 **throughput screening than previously described tracking techniques, making them**  
44 **broadly applicable to large-scale monitoring and conservation of migratory**  
45 **organisms.**

46

## 47 **Introduction**

48 Over half of the Neotropical migrant bird species found breeding in North America have  
49 shown marked declines in abundance over the last several decades (Robbins 1989; Sauer  
50 *et al.* 2012). Population declines are thought to relate to stressors encountered by  
51 migrants at each stage in the annual cycle – the breeding grounds, the wintering grounds,  
52 and migratory stopover points (Rappole 1995). At each stage birds are subject to a  
53 number of disturbances including habitat loss, collisions with wind turbines and cell

54 phone towers, predation by house cats, exposure to disease, and the increasing effects of  
55 global climate change (Altizer *et al.* 2011; Jonzen *et al.* 2006; Loss *et al.* 2013).  
56 However, without the ability to connect populations across the annual cycle it is difficult  
57 to assess the impact of local stressors on population declines. Historically, efforts to map  
58 songbird migration patterns relied on recovery of individual birds previously captured  
59 and tagged with bird bands; however, this approach has met with limited success for  
60 small-bodied songbirds because recapture rates of birds away from their original banding  
61 sites are often very low (< 1 in 10,000) (Faaborg *et al.* 2010b; Gustafson & Hildenbrand  
62 1999). More recently, geo-locators, small tracking devices that record information on  
63 ambient light levels to estimate an individuals location, have increased our knowledge of  
64 the migratory pathways in many songbird species (Stutchbury *et al.* 2009), but remain  
65 impractical for most large-scale applications (1000's of individuals) due to cost, weight  
66 restrictions, and the need to recover individuals to collect data from the devices (Arlt *et*  
67 *al.* 2013; Bridge *et al.* 2013). Alternatively, genetic and isotopic markers that use  
68 information contained within the feathers to pinpoint an individuals population of origin  
69 have broad appeal because they are cost-effective, noninvasive, and do not require  
70 recapture (Kelly *et al.* 2005; Rubenstein *et al.* 2002; Rundel *et al.* 2013), but have been  
71 plagued in the past by low resolution and/or technical issues related to working with  
72 feathers (Lovette *et al.* 2004; Segelbacher 2002; Wunder *et al.* 2005). Thus, there  
73 remains a need for a broadly applicable tracking method that can be used to resolve  
74 populations on spatial scales that are informative for assessing drivers of regional  
75 population declines.  
76

77 In the last several years, genome sequencing has revolutionized the field of molecular  
78 ecology, resulting in new technologies that can be applied to molecular tagging of wild  
79 populations (Davey *et al.* 2011). Genome reduction techniques, such as Restriction Site  
80 Associated DNA sequencing (RAD-seq), can be used to sequence multiple individuals  
81 across a large fraction of the genome and identify hundreds of thousands of genetic  
82 markers that are useful for distinguishing populations (Baird *et al.* 2008). One type of  
83 genetic marker that can be identified from genomic sequence data is a Single Nucleotide  
84 Polymorphism (SNP), DNA sequence variation occurring when a single nucleotide in the  
85 genetic code – A, T, C, or G – differs between individuals or homologous chromosomes.  
86 In particular, SNPs found within or linked to genes under selection often display elevated  
87 allele frequencies and, as a result, can be targeted to reveal population structure at finer  
88 spatial scales than is possible using neutral genetic markers (Nielsen *et al.* 2012; Nielsen  
89 *et al.* 2009). Furthermore, SNP-specific assays designed to target small fragments of  
90 sequence around the SNP loci of interest can be advantageous in cases where the DNA is  
91 highly fragmented or available only in very small quantities, such as DNA from a single,  
92 small passerine feather.

93

94 Here we develop high-resolution SNP markers for tracking populations of a migratory  
95 bird, the Wilson's warbler, *Cardellina pusilla*, using a combination of Restriction Site  
96 Associated DNA paired end sequencing (RAD-PE seq) and high throughput SNPtype<sup>TM</sup>  
97 Assay screening. The Wilson's warbler, a long-distance neotropical migratory bird with  
98 a cross-continental breeding distribution (Ammon & Gilbert 1999), is particularly  
99 appropriate as model for testing the efficacy of high-resolution molecular markers

100 because previous population genetic/connectivity studies on this species provide a solid  
101 basis for comparison between methods (Clegg *et al.* 2003; Irwin *et al.* 2011; Kimura *et*  
102 *al.* 2002; Paxton *et al.* 2007; Paxton *et al.* 2013; Rundel *et al.* 2013; Yong *et al.* 1998).  
103 By harnessing recent advances in Next-Generation Sequencing we scan the genomes of  
104 Wilson's warblers sampled from across the breeding range and identify a set of highly  
105 divergent SNP loci with strong potential for population identification. We then develop  
106 SNPtype™ Assays that target these highly divergent loci and use them to screen 1626  
107 feather and blood samples collected from across the annual cycle in collaboration with  
108 bird banding stations located across North and Central America. We illustrate how the  
109 resulting region-specific migration map can be used to help identify drivers of regional  
110 demographic trends and inform studies of migrant stopover ecology.

111

## 112 **Methods**

### 113 *(a) Sample collection*

114 Collection of 1648 feather and blood samples (22 samples for the SNP ascertainment  
115 panel and 1626 for the SNP screening panel) from 68 locations across the breeding,  
116 wintering and migratory range was made possible through a large collaborative effort  
117 with bird banding stations within and outside of the Monitoring Avian Productivity and  
118 Survivorship (MAPS), the Landbird Monitoring of North America (LaMNA), and the  
119 Monitoreo de Sobrevivencia Invernal (MoSI) networks (Table 1). Genetic samples,  
120 consisting of the tip of one outer rectrix or blood collected by brachial vein puncture and  
121 preserved in lysis buffer (Seutin 1991), were purified using Qiagen DNeasy Blood and  
122 Tissue Kit and quantified using a NanoDrop™ Spectrophotometer (Thermo Scientific,

123 Inc) (Smith *et al.* 2003). Breeding (June 10 – July 31), migratory (March 1 – May 31),  
124 and wintering (December 1 – February 28) samples were collected and categorized into  
125 groups based on collection date, signs of breeding (presence/size of a cloacal  
126 protuberance), signs migration (extent of fat) and life history timetables for the Wilson’s  
127 warbler (Ammon & Gilbert 1999). To assess migratory stopover site use through time,  
128 686 of the 1648 samples from a stopover site located on the Lower Lower Colorado  
129 River, near the town Cibola, AZ, were collected using consistent effort, daily, passive  
130 mist-netting from March 22 – May 24, across the years 2008 and 2009 (Table 1).

131

132 *(b) SNP discovery*

133 To identify SNPs useful for distinguishing genetically distinct regions across the breeding  
134 range of the Wilson’s warbler, an ascertainment panel of 22 individuals was selected to  
135 represent the range of phylogenetic variation known in the species, including all 3  
136 recognized subspecies (Ammon & Gilbert 1999; Kimura *et al.* 2002). Five individuals  
137 from each of five regions were included in the ascertainment panel, except for from the  
138 Southwestern region where samples were limited to 2 individuals (SI Table 1). Purified  
139 extractions from blood samples were quantified using Quant-iT™ PicoGreen® dsDNA  
140 Assay Kit (Invitrogen Inc), and Restriction Site Associated DNA Paired-end (RAD-PE)  
141 libraries containing individually barcoded samples were prepared at Floragenex, Inc.  
142 according to Baird *et al.* (2008) and Ruegg *et al.* (Ruegg *et al.* 2014) (SI Methods).  
143 RAD-PE sequencing made it possible to build longer contigs (~300bp) from short read,  
144 100bp Illumina HiSeq2000 data in order to improve downstream bioinformatics and

145 provide adequate flanking sequence around SNPs for assay development (Etter *et al.*  
146 2011).  
147  
148 Samples from each isolate were sequenced on an Illumina HiSeq2000 (Illumina, San  
149 Diego, CA) using paired-end 100 bp sequencing reads. Paired-end sequences from each  
150 sample were collected, separated by individual, stripped of barcodes, trimmed to 70 bp,  
151 scrubbed of putative contaminant and high-copy-number-sequences and filtered to  
152 include only those with a Phred score  $\geq 10$ . The sample with the greatest number of reads  
153 passing the initial quality filter was used to create a reference set of RAD-PE contigs  
154 against which sequences from other samples were aligned. To create the reference,  
155 primary reads were clustered into unique RAD markers and the paired-end sequences  
156 associated with each RAD tag were assembled *de novo* using Velvet (Zerbino & Birney  
157 2008) into contigs ranging from 180 – 610 bp, with an average length of 300bp. Paired-  
158 end reads from the remaining samples were aligned to this reference using Bowtie  
159 (Langmead & Salzberg 2012) and SNPs were identified using the SAMtools software (Li  
160 *et al.* 2009) with mpileup module under standard conditions.  
161  
162 To narrow our dataset to SNPs we could confidently use to assess population structure we  
163 performed a second round of quality filtering and removed: (1) putative SNPs with no  
164 variants and / or more than two alleles; (2) genotypes in individuals with a quality score  
165 of  $< 30$ ; (3) genotypes with  $< 8$  reads in a homozygote or  $< 4$  reads per allele in  
166 heterozygotes; (4) putative SNPs that had suitable genotypes in  $< 12$  out of the 17  
167 samples from four western populations or  $< 5$  out of the 5 samples from the eastern

168 population and (5) putative SNPs with < 40 bp of flanking sequence on either side. To  
169 limit the chances of including linked markers genomic coordinates were attained by  
170 mapping the remaining contigs to the closest, best annotated, songbird genome, the zebra  
171 finch (*Taeniopygia guttata*) (Version 3.2.4; (Warren *et al.* 2010)) using BLAST+  
172 (version 2.2.25).

173

174 To avoid the possibility of erroneous matches, the data was filtered to include only  
175 contigs that aligned to the zebra finch genome with only a single hit and an E-value < 10<sup>-40</sup>.  
176 Because SNPs with large frequency differences are the most effective for identifying  
177 populations, all SNPs that passed our second round of quality filters were ranked  
178 according to frequency differences between the 5 regions (SI Table 2) and 150 SNPs  
179 displaying the largest allele frequency differences between each of the 10 pairwise  
180 comparisons were selected for conversion to SNPtype™ Assays (Fluidigm Inc). Before  
181 making a final selection, we also considered factors such as: GC content (<65%), number  
182 of genotypes per population, and average coverage at a SNP across all populations (SI  
183 Table 2). An initial assay pre-screening panel was then performed and the assay pool  
184 was further reduced to the 96 assays (the number that fit on a single 96.96 Fluidigm  
185 Array) that could be genotyped most reliably (SI Table 2).

186

### 187 (b) SNP Screening

188 The Fluidigm Corporation EPI™ Genotyping System was used to genotype 96 SNP loci  
189 using 94 individuals per run and 2 non-template controls. To avoid the potential for high-  
190 grading bias (i.e. wrongly inflating the apparent resolving power of a group of loci for



191 population identification) (Anderson 2010), none of the 22 samples used in our original  
192 ascertainment panel were included in the final SNP screening and population structure  
193 analyses. To ensure amplification of low quality or low concentration DNA from  
194 feathers, an initial pre-amplification step was performed according to the manufacturers  
195 protocol using a primer pool containing 96 unlabeled locus-specific SNPtype primers (SI  
196 Methods). PCR products were diluted 1:100 and re-amplified using fluorescently labeled  
197 allele-specific primers. The results were imaged on an EP1 Array Reader and alleles  
198 were called using Fluidigm's automated Genotyping Analysis Software (Fluidigm Inc)  
199 with a confidence threshold of 90%. In addition, all SNP calls were visually inspected  
200 and any calls that did not fall clearly into one of three clusters – heterozygote or either  
201 homozygote cluster - were removed from the analysis. As DNA quality can affect call  
202 accuracy, a stringent quality filter was employed and samples with >90 of 96 missing loci  
203 were dropped. To assess the reliability of SNPtype assays for genotyping DNA from a  
204 variety of sources (blood and feather extractions), the proportion of samples yielding  
205 useable genotype data was calculated. Tests for linkage disequilibrium and conformance  
206 to Hardy-Weinberg equilibrium (HWE) (Louis & Dempster 1987) were performed using  
207 GENEPOP software, vers. 4.0 (Rousset 2008).

208

209 *(c) Population structure analysis*

210 While genetic differentiation ( $F_{ST}$ ) is likely inflated because selected loci were not a  
211 random sample from the genome, we calculated  $F_{ST}$  here for comparison to previous  
212 genetic analysis.  $F_{ST}$  between all pairs of populations was calculated as  $\theta$  (Weir &  
213 Cockerham 1984), using the software GENETIX vers. 4.05 (Belkhir *et al.* 1996-2004)

214 and the data were permuted 1000 times to determine significance. We used the program  
215 STRUCTURE ver. 2.2, to further assess the potential for population structure across the  
216 breeding grounds (Pritchard *et al.* 2000). Ten runs at each K value (K= 1-9) were  
217 performed under the admixture model with correlated allele frequencies using a burn-in  
218 period of 50,000 iterations, a run length of 150,000. All scripts used for the  
219 STRUCTURE runs and subsequent population genomic analyses are located at  
220 <https://github.com/eriqande/wiwa-popgen>. To simplify comparison of results, the  
221 program CLUMPP (Jakobsson & Rosenberg 2007) was used to reorder the cluster labels  
222 between runs, and individual *q* values (proportion of ancestry inferred from each  
223 population within an individual) were plotted using the program Distruct (Rosenberg  
224 2004). Visual inspection of Distruct plots allowed identification of regions where  
225 geographic barriers to gene flow exist and/or where admixture is likely.  
226  
227 To identify how population structure was distributed across geographic space, we used  
228 the program GENELAND (Guillot *et al.* 2005). Analyses in GENELAND were  
229 performed under the spatial model assuming uncorrelated allele frequencies. Inference of  
230 population structuring was based on 10 independent runs, each allowing the number of  
231 populations to vary between 1 and 10. Each run consisted of 2.2 million MCMC  
232 iterations with a thinning interval of 100. Of the 22,000 iterations retained for the MCMC  
233 sample after thinning, the first 5,000 were discarded as burn-in. Post processing of the  
234 MCMC sample was done upon a 250 by 250 point grid that covered the breeding range of  
235 the species. Posterior probability of group membership estimates from GENELAND  
236 were visualized as transparency levels of different colors overlaid upon a base map from

237 Natural Earth ([naturalearthdata.com](http://naturalearthdata.com)) and clipped to the Wilson's warbler breeding range  
238 using a shapefile (NatureServe 2012), making use of the packages `sp`, `rgdal`, and `raster` in  
239 R (Bivand *et al.* 2014; Hijmans 2014; Pebesma & Bivand 2005; Team 2014) (see  
240 <https://github.com/eriqande/wiwa-popgen>). Thus, within each distinguishable group the  
241 transparency of colors is scaled so that the highest posterior probability of membership in  
242 the group according to GENELAND is opaque and the smallest is entirely transparent.

243

244 To assess the accuracy of our baseline for identification of individuals from each  
245 population to genetically distinct breeding groups we used the program GSI\_Sim  
246 (Anderson 2010; Anderson *et al.* 2008). GSI\_Sim uses an unbiased leave-one-out cross-  
247 validation method to assess the accuracy of self-assignment of individuals to populations.  
248 Posterior probabilities were obtained in GSI\_Sim by summing the posterior probabilities  
249 of the populations within each genetically distinct group and assigning the individual to  
250 the genetically distinct group with the highest posterior probability.

251

## 252 **Results**

### 253 *(a) SNP discovery*

254 RAD-PE sequencing on 22 individuals from 5 geographic regions representative of the  
255 range of phylogenetic variation known in the species resulted in 123,005 contigs (average  
256 length ~300 bp), containing 449,596 SNPs passing our initial quality filters (SI Table 1).

257 The median depth of sequencing across all contigs within a library was 33x and the  
258 average Phred quality score per library was 35 (SI Table 1). Overall, 166,268 SNPs  
259 passed the second round of quality filters and 19,707 of those were candidates for

260 conversion into SNPtype™ Assays based upon the absence of variation in 40 base pairs  
261 of flanking sequence surrounding the SNPs. Candidate SNPs were ranked according to  
262 frequency differences, GC content, the number of genotypes per region, and the average  
263 coverage and the final panel was composed of 96 SNPs with pairwise frequency  
264 differences between regions ranging from 1 – 0.4 (SI Table 2). For contigs that could be  
265 mapped to the zebra finch genome with high confidence, the minimum distance between  
266 SNPs was 41KB and no two SNPs were selected from the same contig in order to avoid  
267 the possibility of linked markers (SI Table 2). In this study we refer to the final panel of  
268 96 highly differentiated SNPs as high-resolution genetic markers.

269

#### 270 (b) SNP screening

271 The resulting high resolution genetic markers were used to screen 1626 samples collected  
272 from 68 sampling locations across the breeding, wintering and migratory range (Table 1),  
273 with 117 samples excluded due to low quality genotypes (>6 loci excluded). The  
274 samples with the highest proportion of reliable genotypes were from fresh feather  
275 extractions ( $n_{\text{reliable}} / \text{total} = 660/686$  or 96% reliable), followed by fresh blood extractions  
276 ( $n_{\text{reliable}} / \text{total} = 100/106$  or 94% reliable), and finally extractions that were >3 years old  
277 ( $n_{\text{reliable}} / \text{total} = 701/786$  or 90% reliable). Tests for conformity to HWE revealed that all  
278 but 1 of the 94 loci (AB\_AK\_20) in 2 of the 23 breeding populations (D an L; Table 1,  
279 Fig. 1b) were in HWE after accounting for multiple comparisons ( $p < 0.0005$ ). Deviations  
280 from HWE were likely the result of small sample sizes and or the unintentional inclusion  
281 of late arriving migrants *en route* to northern breeding sites. No loci were found to be in  
282 linkage disequilibrium after accounting for multiple comparisons ( $p < 0.0005$ ), suggesting

283 that loci were not physically linked even in cases where zebra finch genome coordinates  
284 could not be attained.

285

286 *(c) Population Structure analysis*

287 An analysis of population genetic structure on the breeding grounds identified 6  
288 genetically distinguishable groups: Alaska (purple, A - D), eastern North America (red,  
289 U-W), the Southern Rockies and Colorado Plateau (orange, S, T), the Pacific Northwest  
290 (green, G- J), Sierra Nevada (pink, N-P), and Coastal California (yellow, K-M) (Fig. 1a  
291 & b). Pairwise  $F_{ST}$ 's between groups ranged from 0-0.68 with an overall  $F_{ST}$  of 0.179  
292 (95% CI: 0.144 – 0.218). The strongest genetic differentiation was observed between  
293 eastern and western groups ( $F_{ST} = 0.41 - 0.68$ ) with strong genetic differentiation also  
294 seen between the Southern Rockies and Colorado Plateau and all other groups ( $F_{ST} = 0.09$   
295 – 0.27; SI Table 3). The number of genetically distinct groups was set at 6 based upon  
296 convergence between results from STRUCTURE ( $k=6$ , average  $\ln P(X|K) = -33359$ ),  
297 GENELAND, and GSI\_Sim (Fig. 1a&b; Table 2). While 7 genetically distinct groups  
298 was also strongly supported by GENELAND and STRUCTURE ( $K=7$ , average  $\ln P(X|K)$   
299 = -33286; SI Fig. 1), with sampling locations from British Columbia and Alberta (E and  
300 F) forming a seventh group distinct from Alaska, the power to accurately assign  
301 individuals to groups at  $k=7$  decreased significantly using both STRUCTURE and  
302 GSI\_Sim (SI Fig. 1).

303

304 Leave-one-out cross validation using GSI\_Sim indicated that the ability to correctly  
305 assign individuals to groups was high, ranging from 80 - 100%. The eastern group had

306 the highest probability of correct assignment (100%), followed by Alaska to Alberta  
307 (94%), the Southern Rockies and Colorado Plateau (92%), the Pacific Northwest (84%),  
308 the Sierra Nevada (81%) and Coastal California (80%) (Fig. 1b; Table 2). The majority  
309 of the incorrect assignments were between the Pacific Northwest, Sierra Nevada and  
310 Coastal California. Subsequent assignment of migrant and wintering individuals to  
311 genetically distinct breeding groups using GSI\_sim indicated that Coastal California,  
312 Sierra, and Pacific Northwest breeders winter in western Mexico and southern Baja, and  
313 migrate north along the Pacific Flyway, with Coastal California and Sierra breeders  
314 found to the west of the Lower Colorado River (Fig. 1b; SI Table 4). In contrast,  
315 Southern Rocky and Colorado Plateau breeders winter from El Salvador to Costa Rica,  
316 and migrate north through the central US, while eastern breeders winter primarily in the  
317 Yucatan and southern Costa Rica and migrate north through eastern Texas and New York  
318 (Fig. 1b; SI Table 4). Unlike the presence of strong connectivity across much of the  
319 range, Wilson's warblers breeding from Alaska to Alberta were identified in all but one  
320 of our migratory stopover sites and across all wintering areas, apart from western Mexico  
321 and southern Baja (Fig. 1b, all but location g; SI Table 4).

322

323 Assignment of migrants collected in a time series from Cibola, AZ revealed a strong  
324 temporal pattern in stopover site use across the spring migratory period (Fig. 1c; Table 3).  
325 Birds *en route* to coastal California arrived first (week of March 22), followed by birds *en*  
326 *route* to the Pacific Northwest (week of March 29), the Sierra Nevada (week of April 5),  
327 and Alaska to Alberta (week of April 26). Only a few individuals migrating through the  
328 stopover site were identified as Sierra Nevada breeders (3 per year), while no populations

329 breeding in the Southern Rocky and Colorado Plateau and Eastern U.S. were identified  
330 migrating through the stopover site. Temporal patterns in the arrival of spring migrants  
331 were replicated across both the years 2008 and 2009 and were consistent regardless of  
332 known differences in migration patterns by age and sex (Yong *et al.* 1998).

333

### 334 **Discussion**

335 Full life cycle conservation of declining migrant songbirds has been hindered by lack of  
336 an efficient tracking technology that is both broadly applicable and high resolution. Here  
337 we demonstrate how high-resolution molecular markers can be applied towards full life  
338 cycle conservation of a migrant songbird, the Wilson's warbler, with a degree of  
339 reliability and efficiency that has not been demonstrated using previous tracking methods.  
340 By harnessing recent advances in Next-Generation Sequencing we show that 96 highly  
341 divergent SNPs selected from a large pool of candidates (~450,000 SNPs) can be used to  
342 identify genetically distinct groups on spatial scales that are informative for regional  
343 conservation planning. Our analysis indicates that the power to identify individuals to  
344 breeding populations is high (80 - 100%) and that reliable genotypes can be attained from  
345 96% of feathers collected non-invasively from established bird monitoring stations across  
346 North and Central America. Because of the biallelic nature of the SNPs in our panel, our  
347 genetic data are also easier to validate and standardize across labs than isotope and other  
348 genetic methods and, once the assays have been developed, it is possible to genotype  
349 ~300 birds per day for < \$10.00/ individual in almost any well-equipped molecular  
350 laboratory. Overall, the resolution, efficiency, and cost, combined with the ease of  
351 feather collection in collaboration with existing bird monitoring/banding infrastructure,

352 makes high-resolution genetic markers a broadly applicable method for widespread  
353 monitoring of declining songbird species.  
354  
355 One of the central challenges in migratory bird conservation is that population declines  
356 and conservation planning often occur at regional spatial scales, but our knowledge of  
357 migratory connections is usually limited to species-wide range maps. For example, in the  
358 Wilson's warbler, an analysis of Breeding Bird Survey (BBS) data for the years 1966 –  
359 2012 suggests that the species is only slightly declining across its range (BBS Trend = -  
360 1.88, 95% CI = 2.97, -1.11), but an analysis of regional trends suggest that populations in  
361 the Sierra Nevada and the Southern Rockies/Colorado Plateau are declining more  
362 strongly (BBS Trend<sub>sierra</sub> = -4.71, 95% CI = -6.41, -2.85; BBS Trend<sub>rockies</sub> = -2.95, 95%  
363 CI = -4.32, -1.42) (Sauer *et al.* 2012). Here we illustrate that by targeting highly  
364 divergent SNP loci we can confidently identify a minimum of six genetically distinct  
365 groups across the breeding range with a resolution in the western US equivalent to the  
366 spatial scale of regional population declines. Furthermore, the spatial scale of our genetic  
367 groups is commensurate with many *a priori* defined Bird Conservation Regions,  
368 ecologically distinct areas in North America with similar habitats and resource  
369 management issues (Millard *et al.* 2012). The ability to align the spatial scale of  
370 population genetic structure with the spatial scale of population declines and conservation  
371 planning provides a powerful framework from which to base full life cycle conservation  
372 (Fig. 1a & b).  
373



374 The Wilson's warbler has been the focus of numerous population genetic/connectivity  
375 studies in the past decade (Clegg *et al.* 2003; Irwin *et al.* 2011; Kimura *et al.* 2002;  
376 Paxton *et al.* 2007; Paxton *et al.* 2013; Rundel *et al.* 2013; Yong *et al.* 1998), but none  
377 have yielded the depth and clarity of information on migratory connections documented  
378 herein. Our results confirm the presence of previously identified connections between  
379 birds breeding in Coastal California and wintering in Southern Baja, MX and between  
380 birds breeding in eastern North America and wintering in the Yucatan, Belize and Costa  
381 Rica (Kimura *et al.* 2002; Rundel *et al.* 2013), but also reveal new patterns across time  
382 and space that are much richer and stronger than previously recognized. For example,  
383 here we show that Wilson's warblers breeding in Coastal California (Fig. 1b, yellow)  
384 share their wintering area in southern Baja with Pacific Northwest breeders (Fig. 1b,  
385 green) and that both of these groups also winter to the east of Baja in Sinaloa, MX, with  
386 Sierra Nevada breeders (Fig. 1b, pink) (Sauer *et al.* 2012). Samples collected from across  
387 the spring migratory period indicate that western breeders from all three groups (Coastal  
388 California, Pacific Northwest, and Sierra Nevada) migrate north along the Pacific  
389 Flyway, with Coastal California and Sierra Nevada breeders found west of the Lower  
390 Colorado River. In addition, we show for the first time that breeders from the Southern  
391 Rocky Mountains and Colorado Plateau (Fig. 1b, orange) occupy a restricted El  
392 Salvador-to-Costa Rica wintering distribution and migrate North along the Central  
393 Flyway, while eastern breeders (Fig. 1b, red) migrate North through eastern Texas and  
394 New York. Overall our results indicate that screening high volumes of individuals using  
395 high resolution molecular markers can yield a level of clarity in migratory connections

396 across time and space that has not been previously demonstrated using other tracking  
397 techniques.

398

399 The resulting map for the Wilson's warbler provides an example of how information on  
400 region-specific migration patterns can be combined with information on region-specific  
401 population declines in order to strengthen predictions about where migrants are most  
402 limited. In the case of the Wilson's warbler, BBS data suggests that Sierra Nevada  
403 breeders are experiencing strong population declines (BBS Trend<sub>sierra</sub> = 4.71, 95% CI = -  
404 6.41, -2.85), while Pacific Northwest and Coastal California breeders are declining less  
405 severely or remaining stable (BBS Trend<sub>Pacific\_Northwest</sub> = -1.96, 95% CI = -2.54, -1.31;  
406 BBS Trend<sub>Coastal\_California</sub> = -0.49, CI = -1.62, 0.84). The fact that all three groups occupy  
407 distinct breeding ranges, but mix on their wintering grounds and at migratory stopover  
408 sites suggests that declines in Sierra Nevada breeders are likely driven by factors on the  
409 breeding grounds. Alternatively, the migration map as a whole suggests that bottlenecks  
410 for Wilson's warblers likely occur in areas where multiple genetically distinct breeding  
411 groups funnel through the same stopover site or wintering area such as in Coastal  
412 California, Western Mexico, and Costa Rica. These results are supported by work in  
413 other taxa and further emphasize the importance of stopover habitat for migrant  
414 conservation (Sheehy *et al.* 2011).

415

416 Migratory passerines spend roughly a quarter of their year *en route* between breeding and  
417 wintering areas, but relatively little is known about the biology and behavior of migrants  
418 during the migratory phase of their annual cycle (Faaborg *et al.* 2010b). The availability

419 and quality of habitat at stopover sites could have significant effects on populations, but  
420 determining the extent to which physiological and ecological demands experienced  
421 during migration may limit populations is often contingent upon knowledge of an  
422 individuals ultimate destination (Faaborg *et al.* 2010a; Faaborg *et al.* 2010b). Here we  
423 successfully genotype 609 samples collected in a time series from a stopover site near  
424 Cibola, AZ and demonstrate how high-resolution genetic markers can be used to identify  
425 the ultimate destination of birds captured *en route* to their breeding grounds (Fig. 1b &c;  
426 location b). Breaking down the results by week revealed distinct waves of migrants, with  
427 Coastal California breeders arriving first (March 22 – 29), followed by Pacific Northwest  
428 and Sierra Nevada breeders (March 29-April 5), and Alaska-to-Alberta breeders arriving  
429 significantly later (April 19-26). These patterns were replicated across two years and are  
430 consistent regardless of known differences in migration patterns by age and sex (Yong *et*  
431 *al.* 1998). While differences in the timing of migration in Wilson’s warblers have been  
432 suggested in the past based upon changes in the frequency of haplotypes or isotopic  
433 signatures (Paxton *et al.* 2007; Paxton *et al.* 2013), this is the first time that anyone has  
434 attained individual-level assignments of large numbers of migrants collected in a time  
435 series, bringing a new level of clarity to our understanding of stopover site use through  
436 time. It is important to note, that the depth of sampling across time that we are able to  
437 achieve using high-resolution genetic markers would not have been possible using  
438 extrinsic tracking devices, such as geolocators, due of cost and weight restrictions and the  
439 need to recapture individuals to collect the information (Arlt *et al.* 2013; Bridge *et al.*  
440 2013). The resulting information on migratory connections across time can be used to  
441 help build timetables of migration along the Pacific Flyway and help to inform when

442 particularly vulnerable populations may be migrating through an area. Furthermore,  
443 because DNA can be collected from all birds, dead or alive, high resolution genetic  
444 markers could be used to identify migrants subject to collisions with wind turbines, cell  
445 phone towers and other manmade structures.

446

447 While our results suggest that high-resolution molecular markers surpass previous genetic  
448 markers in terms efficiency and resolution, our conclusions could be further strengthened  
449 by the inclusion of additional data and analyses. For example, the robustness of the  
450 patterns described here varies depending upon the sample size at each location and in  
451 some locations, such as in Belize and many of the migratory stopover sites (Fig. 1b,  
452 locations l, d, e, f, g), additional sampling across time and space is needed. In addition,  
453 while our assignment probabilities are very high for an intrinsic marker (80 - 100%) there  
454 is a potential for incorrect assignments, particularly between the three western groups  
455 (Coastal California, Pacific Northwest, and the Sierras) where admixture is likely (Table  
456 2). Similarly, there are large regions on the breeding grounds that could not be  
457 distinguished using our markers, such as birds breeding from Alberta to Alaska (purple,  
458 Fig. 1b). In the future, the addition of more genetic loci as well as the addition of  
459 isotopic markers and statistical methods for combining both sources of data into a single  
460 statistical framework will help further resolve populations across the range (Rundel *et al.*  
461 2013). Lastly, it is important to note that the spatially explicit depiction of the genetic  
462 results generated in GENELAND may not accurately identify the location of boundary  
463 between genetic groups. Additional sampling across the projected boundaries will help  
464 clarify the location of the genetic breaks as well as the factors driving differences

465 between Wilson's warblers in each region. Such genetic differences are particularly  
466 interesting in light of the documented differences in migratory timing for Wilson's  
467 warblers described herein and the potential for migration timing to contribute to  
468 divergence in migratory birds more generally (Bearhop *et al.* 2005; Ruegg *et al.* 2014;  
469 Ruegg *et al.* 2012).

470

471 A review article by Faaborg *et al.* (Faaborg *et al.* 2010b) recently identified continuing  
472 research needs for Neotropical migrant birds, including identifying migratory pathways  
473 and wintering locations, bottlenecks for conservation, and timetables for migration. Here  
474 we demonstrate how high-resolution genetic markers designed for Wilson's warblers, can  
475 be applied to help address many of these continuing research needs with a level of  
476 efficiency and reliability that has not previously been demonstrated. In the last several  
477 years there has been a revolution in sequencing technology that has increased by orders  
478 of magnitude the amount of sequence data that can be generated, while at the same time  
479 reducing the cost of individual-level analysis (Metzker 2010). Our results show that by  
480 harnessing recent advances in sequencing technology it is now possible to develop high-  
481 resolution genetic markers for tracking populations of migrants on a broad scale. The  
482 resulting information on fine-scale population genetic structure, region-specific migratory  
483 connections, and timetables of migration provides a powerful framework from which to  
484 base full life cycle conservation of declining songbird species.

485

486 **Literature Cited**

- 487 Altizer S, Bartel R, Han BA (2011) Animal migration and infectious disease risk. *Science*  
488 **331**, 296-302.
- 489 Ammon E, M., Gilbert W, M. (1999) Wilson's Warbler (*Cardellina pusilla*). In: *The*  
490 *Birds of North America Online* (ed. Poole A), Ithaca: Cornell Lab of Ornithology.
- 491 Anderson EC (2010) Assessing the power of informative subsets of loci for population  
492 assignment: standard methods are upwardly biased. *Mol Ecol Resour* **10**, 701-710.
- 493 Anderson EC, Waples RS, Kalinowski ST (2008) An improved method for predicting the  
494 accuracy of genetic stock identification. *Canadian Journal of Fisheries and*  
495 *Aquatic Sciences* **65**, 1475-1486.
- 496 Arlt D, Low M, Part T (2013) Effect of geolocators on migration and subsequent  
497 breeding performance of a long-distance passerine migrant. *PLoS ONE* **8**, e82316.
- 498 Baird NA, Etter PD, Atwood TS, *et al.* (2008) Rapid SNP Discovery and Genetic  
499 Mapping Using Sequenced RAD Markers. *PLoS ONE* **3**, e3376.
- 500 Bearhop S, Fiedler W, Furness RW, *et al.* (2005) Assortative mating as a mechanism for  
501 rapid evolution of a migratory divide. *Science* **310**, 502-504.
- 502 Belkhir K, Borsa P, Chikhi L, Raufaste N, Bonhomme F (1996-2004) GENETIX 4.05,  
503 logiciel sous Windows™ pour le genetique des populations. . Universite de  
504 Montpellier II, Montepellier (France), Laboratoire Genome, Populations,  
505 Interactions.
- 506 Bivand R, Keitt T, Rowlingson B (2014) rgdal: Bindings for the Geospatial Data  
507 Abstraction Library. *R package version 0.8 - 16*.
- 508 Bridge ES, Kelly JF, Contina A, *et al.* (2013) Advances in tracking small migratory birds:  
509 a technical review of light-level geolocation. *Journal of Field Ornithology* **84**,  
510 121-137.
- 511 Clegg SM, Kelly JF, Kimura M, Smith Thomas B (2003) Combining genetic markers and  
512 stable isotopes to reveal population connectivity and migration patterns in a  
513 Neotropical migrant, Wilson's warbler (*Wilsonia pusilla*). *Molecular Ecology* **12**,  
514 819-830.
- 515 Davey JW, Hohenlohe PA, Etter PD, *et al.* (2011) Genome-wide genetic marker  
516 discovery and genotyping using next-generation sequencing. *Nature Reviews*  
517 *Genetics* **12**, 499-510.
- 518 Etter PD, Preston JL, Bassham S, Cresko WA, Johnson EA (2011) Local *De Novo*  
519 Assembly of RAD Paired-End Contigs Using Short Sequencing Reads. *PLoS*  
520 *ONE* **6**, e18561.
- 521 Faaborg J, Holmes RT, Anders AD, *et al.* (2010a) Recent advances in understanding  
522 migration systems of New World land birds. *Ecological Monographs* **80**, 3-48.
- 523 Faaborg J, Holmes RT, Anders AD, *et al.* (2010b) Conserving migratory land birds in the  
524 new world: do we know enough? *Ecological Applications* **20**, 398-418.
- 525 Guillot G, Estoup A, Mortier F, Cosson JF (2005) A spatial statistical model for  
526 landscape genetics. *Genetics* **170**, 1261-1280.
- 527 Gustafson ME, Hildenbrand J (1999) *Bird Banding Laboratory Homepage, ver 07-10-*  
528 *2005*.
- 529 Hijmans RJ (2014) Raster: Geographic data analysis and modeling. *R package version*  
530 *2.2-31*.

- 531 Irwin DE, Irwin JH, Smith TB (2011) Genetic variation and seasonal migratory  
532 connectivity in Wilson's warblers (*Wilsonia pusilla*): species-level differences in  
533 nuclear DNA between western and eastern populations. *Molecular Ecology* **20**,  
534 3102-3115.
- 535 Jakobsson M, Rosenberg NA (2007) CLUMPP: a cluster matching and permutation  
536 program for dealing with label switching and multimodality in analysis of  
537 population structure. *Bioinformatics* **23**, 1801-1806.
- 538 Jonzen N, Linden A, Ergon T, *et al.* (2006) Rapid advance of spring arrival dates in long-  
539 distance migratory birds. *Science* **312**, 1959-1961.
- 540 Kelly JF, Ruegg KC, Smith TB (2005) Combining isotopic and genetic markers to  
541 identify breeding origins of migrant birds. *Ecological Applications* **15**, 1487-  
542 1497.
- 543 Kimura M, Clegg SM, Lovette IJ, *et al.* (2002) Phylogeographical approaches to  
544 assessing demographic connectivity between breeding and overwintering regions  
545 in a Nearctic-Neotropical warbler (*Wilsonia pusilla*). *Molecular Ecology* **11**,  
546 1605-1616.
- 547 Langmead B, Salzberg SL (2012) Fast gapped-read alignment with Bowtie 2. *Nat*  
548 *Methods* **9**, 357-359.
- 549 Li H, Handsaker B, Wysoker A, *et al.* (2009) The Sequence Alignment/Map format and  
550 SAMtools. *Bioinformatics* **25**, 2078-2079.
- 551 Loss SR, Will T, Marra PP (2013) The impact of free-ranging domestic cats on wildlife  
552 of the United States. *Nat Commun* **4**, 1396.
- 553 Louis EJ, Dempster ER (1987) An exact test for Hardy-Weinberg and multiple alleles.  
554 *Biometrics* **43**, 805-811.
- 555 Lovette IJ, Clegg SM, Smith TB (2004) Limited Utility of mtDNA Markers for  
556 Determining Connectivity among Breeding and Overwintering Locations in Three  
557 Neotropical Migrant Birds. *Conservation Biology* **18**, 156-166.
- 558 Metzker ML (2010) Sequencing technologies - the next generation. *Nature Reviews*  
559 *Genetics* **11**, 31-46.
- 560 Millard MJ, Czarnecki CA, Morton JM, *et al.* (2012) A National Geographic Framework  
561 for Guiding Conservation on a Landscape Scale. *Journal of Fish and Wildlife*  
562 *Management* **3**, 175-183.
- 563 NatureServe BIA (2012) *Bird species distribution maps of the world* NatureServe,  
564 Arlington, USA.
- 565 Nielsen EE, Cariani A, Mac Aoidh E, *et al.* (2012) Gene-associated markers provide  
566 tools for tackling illegal fishing and false eco-certification. *Nat Commun* **3**, 851.
- 567 Nielsen EE, Hemmer-Hansen J, Larsen PF, Bekkevold D (2009) Population genomics of  
568 marine fishes: identifying adaptive variation in space and time. *Molecular*  
569 *Ecology* **18**, 3128-3150.
- 570 Paxton KL, Van Ripper III C, Theimer TC, Paxton EH (2007) Spatial and temporal  
571 migration patterns of Wilson's warbler (*Wilsonia pusilla*) in the southeast as  
572 revealed by stable isotopes. *The Auk* **124**, 162-175.
- 573 Paxton KL, Yau M, Moore FR, Irwin D (2013) Differential migratory timing of western  
574 populations of Wilson's warblers (*Cardellina pusilla*) revealed by mitochondrial  
575 DNA and stable isotopes. *Auk* **130**, 689.
- 576 Pebesma EJ, Bivand RS (2005) Classes and methods for spatial data in R. *R News* **5**.

- 577 Pritchard JK, Stephens M, Donnelly P (2000) Inference of population structure using  
578 multilocus genotype data. *Genetics* **155**, 945-959.
- 579 Rappole JH (1995) *The ecology of migrant birds - a Neotropical perspective* Smithsonian  
580 Institution Press, Washington.
- 581 Robbins CS, J. R. Sauer, R. Greenberg, and S. Droege (1989) Population declines in  
582 North American birds that migrate to the Neotropics. *Proc. Nat. Acad. Sci.* **86**,  
583 7658-7662.
- 584 Rosenberg NA (2004) Distruct: a program for the graphical display of population  
585 structure. *Molecular Ecology Notes* **4**.
- 586 Rousset F (2008) genepop'007: a complete re-implementation of the genepop software  
587 for Windows and Linux. *Molecular Ecology Resources* **8**, 103-106.
- 588 Rubenstein DR, Chamberlain CP, Holmes RT, *et al.* (2002) Linking breeding and  
589 wintering ranges of a migratory songbird using stable isotopes. *Science* **295**,  
590 1062-1065.
- 591 Ruegg K, Anderson EC, Boone J, Pouls J, Smith TB (2014) A role for migration-linked  
592 genes and genomic islands in divergence of a songbird. *Molecular Ecology*.
- 593 Ruegg K, Anderson EC, Slabbekoorn H (2012) Differences in timing of migration and  
594 response to sexual signalling drive asymmetric hybridization across a migratory  
595 divide. *Journal of Evolutionary Biology* **25**, 1741-1750.
- 596 Rundel CW, Wunder MB, Alvarado AH, *et al.* (2013) Novel statistical methods for  
597 integrating genetic and stable isotope data to infer individual-level migratory  
598 connectivity. *Molecular Ecology* **22**, 4163-4176.
- 599 Sauer JR, Hines JE, Fallon JE, *et al.* (2012) The North American Breeding Bird Survey,  
600 Results and Analysis 1966-2011. USGS Patuxent Wildlife Research Center,  
601 Laurel, MD.
- 602 Segelbacher G (2002) Noninvasive genetic analysis in birds: testing reliability of feather  
603 samples. *Molecular Ecology Notes* **2**, 367-369.
- 604 Seutin G, B. N. White and P. T. Boag (1991) Preservation of avian blood and tissue  
605 samples for DNA analyses. *Canadian Journal of Zoology* **69**, 82-90.
- 606 Sheehy J, Taylor CM, Norris DR (2011) The importance of stopover habitat for  
607 developing effective conservation strategies for migratory animals. *Journal of*  
608 *Ornithology* **152**, 161-168.
- 609 Smith TB, Wayne RK, Marra PP, *et al.* (2003) A call for feather sampling. *The Auk* **120**,  
610 218-221.
- 611 Stutchbury BJ, Tarof SA, Done T, *et al.* (2009) Tracking long-distance songbird  
612 migration by using geolocators. *Science* **323**, 896.
- 613 Team RC (2014) *R: A language and environment for statistical computing.*, Vienna,  
614 Austria. <http://www.R-project.org/>
- 615 Warren WC, Clayton DF, Ellegren H, *et al.* (2010) The genome of a songbird. *Nature*  
616 **464**, 757-762.
- 617 Weir BS, Cockerham CC (1984) Estimating F-statistics for the analysis of population  
618 structure. *Evolution* **38**, 1358-1370.
- 619 Wunder MB, Kester CL, Knopf FL, Rye RO (2005) A test of geographic assignment  
620 using isotope tracers in feathers of known origin. *Oecologia* **144**, 607-617.
- 621 Yong W, Finch DM, Moore FR, Kelly JF (1998) Stopover ecology and habitat use of  
622 migratory Wilson's Warblers. *Auk* **115**, 829-842.



623 Zerbino DR, Birney E (2008) Velvet: algorithms for de novo short read assembly using  
624 de Bruijn graphs. *Genome Research* **18**, 821-829.  
625

626 **Acknowledgements.** We would like to thank J.C. Garza at the Southwest Fisheries  
627 Science Center for the use of laboratory space and equipment. This research was  
628 supported by a grant to K. Ruegg from the California Institute for the Energy and the  
629 Environment (POEA01-Z01), a donation from Margery Nicolson, a grant to T.B. Smith  
630 from The Turner Foundation, EPA (RD-83377801), and a grant to F. Moore from the  
631 National Science Foundation (IOS-0844703). We would also like to thank J. Boone and  
632 T. Atwood for their assistance with the laboratory and bioinformatics components of the  
633 assay design, the many LaMNA, MAPS, and MoSI station operators who contributed  
634 avian tissue samples, C.J. Ralph, L. West, D. Kaschube, P. Pyle, J. Saracco, and R.  
635 Taylor for coordinating sampling efforts. We are grateful to the USDI Fish and Wildlife  
636 Service, the National Park Service, and USDA Forest Service for funding to help operate  
637 LaMNA, MAPS and MoSI stations that provided feather samples for this work as well as  
638 field crews and staff at Cibola National Wildlife Refuge for help with sample collection  
639 and field logistics.

640

641 **Author Contributions.** K. Ruegg and T.B. Smith conceived of the study and K. Ruegg  
642 wrote the majority of the manuscript and conducted and/or oversaw the analyses. E.C.  
643 Anderson wrote the scripts for the population genomic analyses and figure creation. K.  
644 Paxton and F. Moore contributed ideas and genetic material for the analysis of migrants  
645 from Cibola, AZ. V. Apkenas conducted and helped analyze data for the SNP screening.  
646 S. Lao assisted with feather sample organization, extraction, and the analysis of  
647 genotyping reliability scores. R.B. Siegel and D.F. DeSante facilitated the collection of  
648 feather samples in collaboration with bird banding stations within and outside of the

649 Monitoring Avian Productivity and Survivorship (MAPS) and the Monitoreo de  
650 Sobrevivencia Invernal (MoSI) networks.

651

652 **Figure Legend**

653 **Figure 1.** Migratory connections in the Wilson's warbler identified using SNP-based  
654 genetic markers. A) Results from STRUCTURE showing 6 genetically distinct  
655 populations across the breeding grounds. Capital letters (A-W) refer to the location of  
656 breeding populations depicted on the map in B as well as listed in Table 1. B) Spatially  
657 explicit population structure across the annual cycle. The colors across the breeding  
658 range represent the results from GENELAND which were post-processed using R so that  
659 the density of each color reflects the relative posterior probability of membership for each  
660 pixel to the most probable of the 6 different genetic clusters (see text). The results were  
661 clipped to the species distribution map (NatureServe 2012). Lower case letters (a-g)  
662 represent the location of wintering and spring migratory samples (Table 1). Pie charts  
663 indicate the proportion of wintering individuals assigned to each breeding group with the  
664 number of individuals listed at the center of each pie. Arrows represent the proportion of  
665 migrants assigned to each breeding group with the numbers of individuals listed at the top  
666 of the arrows. C) The proportion of individuals assigned to each breeding population  
667 across spring migration of 2008 and 2009. Numbers in the center of the pies refer to  
668 sample sizes and the data are grouped by week with the date representing the mid-week  
669 date in a non-leap year.

**Table 1.** Number of Wilson’s warblers successfully screened at each location across the species breeding, wintering and migratory range. Locations in close proximity were merged on the map in Fig. 1. Uppercase letters are reserved for breeding populations, while lower case letters are reserved for migratory stopover and wintering locations.

| <b>Location</b>                      | <b>Latitude</b> | <b>Longitude</b> | <b>N</b> | <b>Population</b> |
|--------------------------------------|-----------------|------------------|----------|-------------------|
| <b>Breeding (Jun 10 - July 31)</b>   |                 |                  |          |                   |
| Cantwell_1, Denali National Park, AK | 63.449          | -150.813         | 10       | A                 |
| Cantwell_2, Denali National Park, AK | 63.594          | -149.611         | 11       | A                 |
| Denali, Denali National Park, AK     | 63.716          | -149.088         | 8        | A                 |
| Yakutat, AK                          | 59.514          | -139.681         | 21       | B                 |
| Ugashik_1, AK                        | 57.175          | -157.269         | 10       | C                 |
| Ugashik_2, AK                        | 57.183          | -157.283         | 16       | C                 |
| Juneau, AK                           | 58.300          | -134.400         | 10       | D                 |
| Hardisty Creek, Calgary, AB          | 53.500          | -117.500         | 2        | E                 |
| Ram Falls, Calgary, AB               | 52.000          | -115.800         | 5        | E                 |
| Benjamin Creek, Calgary, AB          | 51.500          | -115.000         | 2        | E                 |
| Beaver Dam, Calgary, AB              | 51.104          | -114.063         | 16       | E                 |

|                     |        |          |    |   |
|---------------------|--------|----------|----|---|
| 100 Mile House, BC  | 51.700 | -121.300 | 13 | F |
| Darrington, WA      | 48.208 | -121.576 | 3  | G |
| Silverton, WA       | 48.051 | -121.433 | 5  | G |
| Roy, WA             | 47.056 | -122.488 | 4  | G |
| Harlan, OR          | 44.506 | -123.630 | 23 | H |
| McKenzie Bridge, OR | 44.199 | -121.956 | 22 | I |
| Eureka, CA          | 40.783 | -124.123 | 18 | J |
| Half Moon Bay, CA   | 37.506 | -122.494 | 17 | K |
| Big Sur, CA         | 36.286 | -121.842 | 15 | L |
| San Luis Obispo, CA | 35.195 | -120.489 | 23 | M |
| Tennant, CA         | 41.492 | -121.939 | 25 | N |
| Clio, CA            | 39.667 | -120.600 | 15 | O |
| Hume, CA            | 36.799 | -118.599 | 16 | P |
| Hillary Meadow, MT  | 48.347 | -113.976 | 2  | Q |
| Crow Creek, MT      | 47.471 | -114.279 | 1  | Q |
| Elgin_1, OR         | 45.817 | -117.865 | 4  | R |
| Elgin_2, OR         | 45.679 | -118.115 | 21 | R |

|                                |        |          |    |   |
|--------------------------------|--------|----------|----|---|
| Pingree Park, Fort Collins, CO | 40.550 | -105.567 | 19 | S |
| Grand Mesa, CO                 | 39.000 | -107.900 | 11 | T |
| Camp Myrica, QC                | 49.700 | -73.300  | 17 | U |
| Hilliardton, ON                | 47.500 | -79.700  | 4  | V |
| Fredericton, NB                | 45.800 | -66.700  | 4  | W |

---

**Migratory Stopover (March - May)**

|                                               |        |          |     |   |
|-----------------------------------------------|--------|----------|-----|---|
| O'neil Forbay Wildlife Area, CA               | 37.080 | -121.022 | 75  | a |
| Lower Colorado River, Cibola, AZ              | 33.300 | -114.683 | 604 | b |
| Buenos Aires National Wildlife Refuge, AZ     | 31.550 | -111.550 | 71  | c |
| San Pedro Riparian National Cons. Area,<br>AZ | 31.583 | -110.133 | 52  | c |
| Albuquerque, NM                               | 35.013 | -106.465 | 12  | d |
| Sierra del Carmen_1, Coahuila, MX             | 28.909 | -102.546 | 4   | e |
| Sierra del Carmen_2, Coahuila, MX             | 28.861 | -102.650 | 3   | e |
| Fairview, TX                                  | 33.152 | -96.600  | 43  | f |
| Braddock Bay, NY                              | 43.161 | -77.611  | 19  | g |

---

### Wintering (Dec - Feb)

|                                               |        |          |    |   |
|-----------------------------------------------|--------|----------|----|---|
| San Jose del Cabo, Baja California Sur, MX    | 22.883 | -109.900 | 8  | h |
| Chupaderos, Sinaloa, MX                       | 23.333 | -105.500 | 8  | i |
| Las Joyas, Autlan, Jalisco, MX                | 19.767 | -104.367 | 25 | j |
| Nevado de Colima, Colima, Jalisco, MX         | 19.233 | -103.717 | 3  | j |
| U. of Mexico, San Angel, Distrito Federal, MX | 19.313 | -99.179  | 9  | k |
| El Cielo Biosphere Reserve, Tamulipas, MX     | 23.000 | -99.100  | 15 | l |
| Coatatepec, Veracruz, MX                      | 19.450 | -96.967  | 13 | m |
| Parque Macuiltepec, Xalapa, Veracruz, MX      | 19.548 | -96.921  | 7  | m |
| Aeropuerto, Oaxaca, MX                        | 17.100 | -96.800  | 14 | n |
| Tuxtlas, Veracruz, MX                         | 18.400 | -95.200  | 9  | o |
| Chaa Creek, San Ignacio, BE                   | 17.094 | -89.069  | 1  | p |
| Izalco, Sonsonate, SV                         | 13.821 | -89.653  | 17 | q |
| Los Andes National Park, Santa Ana, SV        | 13.850 | -89.620  | 7  | q |
| Las Lajas, Santa Ana, SV                      | 13.943 | -89.617  | 7  | q |
| Metapan, Santa Ana, SV                        | 14.403 | -89.360  | 9  | q |

|                                          |        |         |    |   |
|------------------------------------------|--------|---------|----|---|
| San Salvador Volcano, SV                 | 13.700 | -89.200 | 12 | q |
| Cantoral, Tegucigalpa, HN                | 14.331 | -87.399 | 11 | r |
| La Tigra National Park, Tegucigalpa, HN  | 14.100 | -87.217 | 15 | r |
| El Jaguar Cafetal, Jinotega, NI          | 13.229 | -86.053 | 10 | s |
| Volcan Mombacho, Granada, NI             | 11.832 | -86.008 | 2  | s |
| Monteverde Cloud Forest, Santa Elena, CR | 10.314 | -84.825 | 9  | t |
| San Vito_1, Puntarenas, CR               | 8.754  | -82.926 | 2  | u |
| San Vito_2, Puntarenas, CR               | 8.766  | -82.943 | 2  | u |
| San Vito_3, Puntarenas, CR               | 8.784  | -82.975 | 5  | u |
| San Vito_4, Puntarenaus, CR              | 8.809  | -82.924 | 1  | u |
| San Vito_5, Puntarenaus, CR              | 8.822  | -82.972 | 12 | u |

---



**Table 2.** Assignment of Wilson's warblers of known origin back to breeding population using

GSI\_Sim. Population names are listed in Table 1 and the colors indicate the genetic group ( Fig. 1).

| <b>Population<br/>(Fig. 1,<br/>Table 1)</b> | <b>Alaska to<br/>Alberta</b> | <b>Pacific<br/>Northwest</b> | <b>Coastal<br/>California</b> | <b>Sierra</b> | <b>Rocky<br/>Mountain</b> | <b>Eastern</b> |
|---------------------------------------------|------------------------------|------------------------------|-------------------------------|---------------|---------------------------|----------------|
| <b>A</b>                                    | 29                           | 0                            | 0                             | 0             | 0                         | 0              |
| <b>B</b>                                    | 21                           | 0                            | 0                             | 0             | 0                         | 0              |
| <b>C</b>                                    | 26                           | 0                            | 0                             | 0             | 0                         | 0              |
| <b>D</b>                                    | 10                           | 0                            | 0                             | 0             | 0                         | 0              |
| <b>E</b>                                    | 24                           | 0                            | 0                             | 0             | 1                         | 0              |
| <b>F</b>                                    | 9                            | 0                            | 0                             | 0             | 4                         | 0              |
| <b>G</b>                                    | 2                            | 9                            | 1                             | 0             | 0                         | 0              |
| <b>H</b>                                    | 0                            | 20                           | 3                             | 0             | 0                         | 0              |
| <b>I</b>                                    | 0                            | 20                           | 1                             | 1             | 0                         | 0              |
| <b>J</b>                                    | 0                            | 15                           | 0                             | 3             | 0                         | 0              |
| <b>K</b>                                    | 0                            | 2                            | 14                            | 1             | 0                         | 0              |
| <b>L</b>                                    | 0                            | 3                            | 11                            | 1             | 0                         | 0              |
| <b>M</b>                                    | 0                            | 1                            | 19                            | 3             | 0                         | 0              |
| <b>N</b>                                    | 0                            | 2                            | 2                             | 21            | 0                         | 0              |
| <b>O</b>                                    | 0                            | 1                            | 2                             | 12            | 0                         | 0              |
| <b>P</b>                                    | 0                            | 1                            | 0                             | 15            | 0                         | 0              |
| <b>Q</b>                                    | 1                            | 0                            | 0                             | 0             | 2                         | 0              |
| <b>R</b>                                    | 6                            | 0                            | 0                             | 0             | 19                        | 0              |
| <b>S</b>                                    | 0                            | 0                            | 0                             | 0             | 19                        | 0              |
| <b>T</b>                                    | 0                            | 0                            | 0                             | 0             | 11                        | 0              |
| <b>U</b>                                    | 0                            | 0                            | 0                             | 0             | 0                         | 17             |
| <b>V</b>                                    | 0                            | 0                            | 0                             | 0             | 0                         | 4              |
| <b>W</b>                                    | 0                            | 0                            | 0                             | 0             | 0                         | 4              |

**Table 3.** Genetic identification of Wilson's Warblers migrating through Cibola, CA by week across the years 2008 and 2009. Results represent the individuals assigned to one of the six genetically distinct groups using the program GSI Sim and the data corresponds to the information presented in Figure 1c.

| <b>Mid-week Date*</b> | <b>Week</b> | <b>Alaska to Alberta</b> | <b>Pacific NW</b> | <b>Coastal CA</b> | <b>Sierra Nevada</b> | <b>Rocky Mt.</b> | <b>Eastern</b> |
|-----------------------|-------------|--------------------------|-------------------|-------------------|----------------------|------------------|----------------|
| <b>Year 2008</b>      |             |                          |                   |                   |                      |                  |                |
| 21-Mar                | 11          | 0                        | 0                 | 0                 | 0                    | 0                | 0              |
| 28-Mar                | 12          | 0                        | 3                 | 1                 | 0                    | 0                | 0              |
| 4-Apr                 | 13          | 0                        | 11                | 16                | 1                    | 0                | 0              |
| 11-Apr                | 14          | 0                        | 9                 | 4                 | 1                    | 0                | 0              |
| 18-Apr                | 15          | 0                        | 5                 | 0                 | 0                    | 0                | 0              |
| 25-Apr                | 16          | 16                       | 11                | 1                 | 0                    | 0                | 0              |
| 2-May                 | 17          | 24                       | 6                 | 0                 | 0                    | 0                | 0              |
| 9-May                 | 18          | 32                       | 2                 | 0                 | 0                    | 0                | 0              |
| 16-May                | 19          | 46                       | 3                 | 0                 | 1                    | 0                | 0              |
| 23-May                | 20          | 25                       | 0                 | 0                 | 0                    | 0                | 0              |
| <b>Year 2009</b>      |             |                          |                   |                   |                      |                  |                |
| 22-Mar                | 11          | 0                        | 0                 | 2                 | 0                    | 0                | 0              |
| 29-Mar                | 12          | 0                        | 3                 | 7                 | 0                    | 0                | 0              |
| 5-Apr                 | 13          | 0                        | 5                 | 10                | 0                    | 0                | 0              |

|        |    |    |    |    |   |   |   |
|--------|----|----|----|----|---|---|---|
| 12-Apr | 14 | 0  | 6  | 10 | 0 | 0 | 0 |
| 19-Apr | 15 | 0  | 10 | 6  | 1 | 0 | 0 |
| 26-Apr | 16 | 12 | 6  | 0  | 0 | 0 | 0 |
| 3-May  | 17 | 74 | 21 | 6  | 1 | 0 | 0 |
| 10-May | 18 | 56 | 25 | 1  | 1 | 0 | 0 |
| 17-May | 19 | 82 | 6  | 0  | 0 | 0 | 0 |
| 24-May | 20 | 33 | 1  | 1  | 0 | 0 | 0 |

---

\* Dates represent the midweek date in a non-leap year

A) Breeding population structure

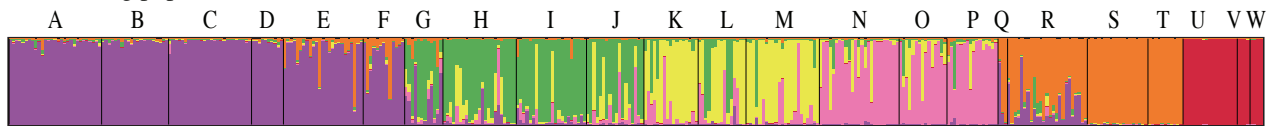

B) Spatially explicit population structure

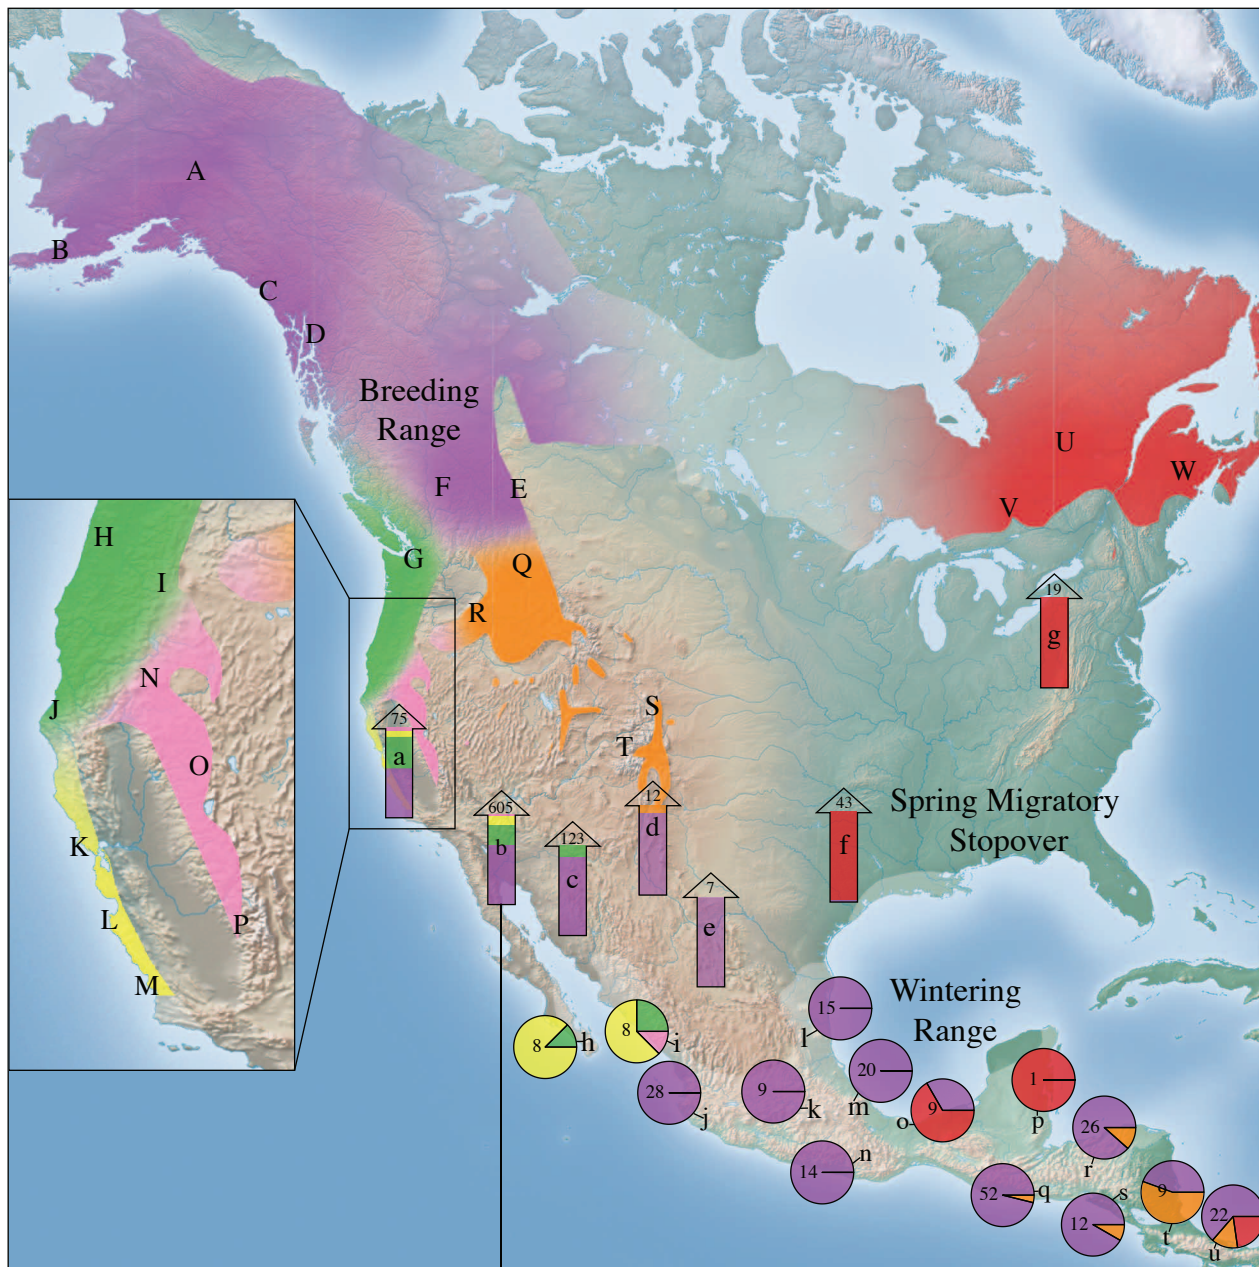

C) Population structure across time, Cibola CA (b, above)

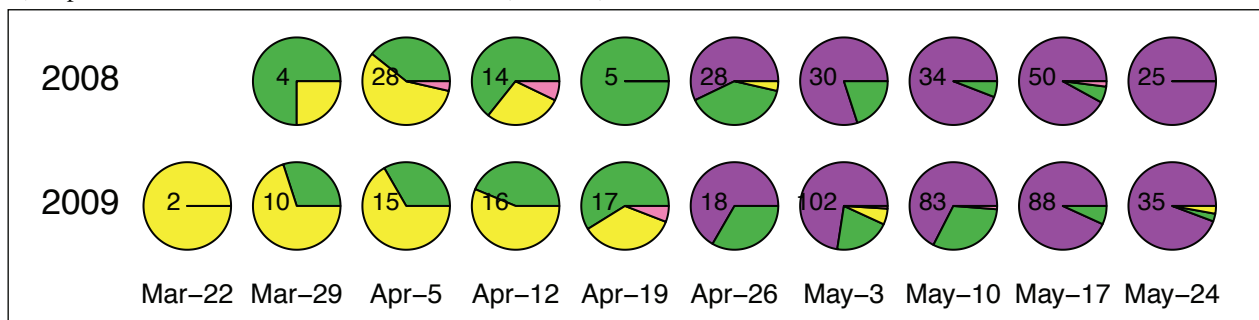

Source: https://www.biorxiv.org/content/10.1101/007757.full.pdf
